# Supplementary material
Source: ML conference proceedings conference paper supplement (https://proceedings.neurips.cc/paper_files/paper/2022/hash/29241c7caf8230e47cefca6ad3a91f21-Abstract.html)
Supplement: Supplementary file 1 [file 29241c7caf8230e47cefca6ad3a91f21-Supplemental-Conference.zip]

Archive with 36 entries (32 files):
- supplementary/
- __MACOSX/._supplementary
- supplementary/.DS_Store
- __MACOSX/supplementary/._.DS_Store
- supplementary/supplementary.pdf
- __MACOSX/supplementary/._supplementary.pdf
- supplementary/supplementary_code/
- __MACOSX/supplementary/._supplementary_code
- supplementary/supplementary_code/gridworld/
- __MACOSX/supplementary/supplementary_code/._gridworld
- supplementary/supplementary_code/run.py
- __MACOSX/supplementary/supplementary_code/._run.py
- supplementary/supplementary_code/requirements.txt
- __MACOSX/supplementary/supplementary_code/._requirements.txt
- supplementary/supplementary_code/script.sh
- __MACOSX/supplementary/supplementary_code/._script.sh
- supplementary/supplementary_code/policy.py
- __MACOSX/supplementary/supplementary_code/._policy.py
- supplementary/supplementary_code/run_utils.py
- __MACOSX/supplementary/supplementary_code/._run_utils.py
- supplementary/supplementary_code/README.md
- __MACOSX/supplementary/supplementary_code/._README.md
- supplementary/supplementary_code/transition_data.py
- __MACOSX/supplementary/supplementary_code/._transition_data.py
- supplementary/supplementary_code/gridworld/.DS_Store
- __MACOSX/supplementary/supplementary_code/gridworld/._.DS_Store
- supplementary/supplementary_code/gridworld/__pycache__/
- __MACOSX/supplementary/supplementary_code/gridworld/.___pycache__
- supplementary/supplementary_code/gridworld/environments.py
- __MACOSX/supplementary/supplementary_code/gridworld/._environments.py
- supplementary/supplementary_code/gridworld/policies.py
- __MACOSX/supplementary/supplementary_code/gridworld/._policies.py
- supplementary/supplementary_code/gridworld/__pycache__/policies.cpython-36.pyc
- __MACOSX/supplementary/supplementary_code/gridworld/__pycache__/._policies.cpython-36.pyc
- supplementary/supplementary_code/gridworld/__pycache__/environments.cpython-36.pyc
- __MACOSX/supplementary/supplementary_code/gridworld/__pycache__/._environments.cpython-36.pyc
