# Supplementary material
Source: ML conference proceedings conference paper supplement (https://proceedings.neurips.cc/paper_files/paper/2022/hash/29241c7caf8230e47cefca6ad3a91f21-Abstract.html)
Supplement: Supplementary file 1 [file 29241c7caf8230e47cefca6ad3a91f21-Supplemental-Conference.zip › supplementary/supplementary_code/README.md]

# DualDICE

Code for submission #7953 "Beyond the Return: Off-policy Function Estimation under User-specified Error-measuring Distributions."

Our code is built on the code for DualDICE (https://arxiv.org/abs/1906.04733) from Google Research (https://github.com/google-research/google-research/tree/master/dual_dice). 

Simplified versions of the scripts used to produce Figures 1 and 2 are provided in script.sh. 
