# Supplementary material
Source: ML conference proceedings conference paper supplement (https://proceedings.neurips.cc/paper_files/paper/2022/hash/29241c7caf8230e47cefca6ad3a91f21-Abstract.html)
Supplement: Supplementary file 1 [file 29241c7caf8230e47cefca6ad3a91f21-Supplemental-Conference.zip › supplementary/supplementary_code/requirements.txt]

absl-py>=0.5.0
numpy>=1.13.3
tensorflow>=1.11.0
attrs
