# Supplementary material
Source: ML conference proceedings conference paper supplement (https://proceedings.neurips.cc/paper_files/paper/2022/hash/29241c7caf8230e47cefca6ad3a91f21-Abstract.html)
Supplement: Supplementary file 1 [file 29241c7caf8230e47cefca6ad3a91f21-Supplemental-Conference.zip › supplementary/supplementary_code/script.sh]

python run.py --logtostderr \
--num_seeds=10 \
--num_trajectories=100 \
--name=figure_1

python run.py --logtostderr \
--num_seeds=10 \
--num_trajectories=100 \
--model_type=full \
--model_quality=0.5 \
--name=figure_2
